# Supplementary material
Source: PubMed Central journal article supplement (PMC3310419)

## **Molecular Pharmacology**

### **Obatoclox and Lapatinib interact to induce toxic autophagy through NOXA**

Yong Tang, Hossein A. Hamed, Nichola Cruickshanks,  
Paul B. Fisher, Steven Grant and Paul Dent

Departments of Neurosurgery (YT, HAH, NC, PD), Human and Molecular Genetics (PBF) and Medicine (SG), Massey Cancer Center, Box 980035, Virginia Commonwealth University, Richmond, VA 23298-0035, USA.

**Supplemental Figures S1-S3. Expression / phosphorylation of proteins whose activity or expression has been targeted.** The panels show proteins whose expression/phosphorylation has been: (Figure S1) knocked down by siRNA (ATM, Beclin1, ATG5); (Figure S2) where dominant negative p38 blocks HSP27 phosphorylation and dominant negative MEK1 blocks ERK1/2 phosphorylation; (Figure S3) where ca-p70 and ca-mTOR both increase the levels of P-S6 and maintain S6 phosphorylation after lapatinib + obatoclox treatment.

**Figure S1**

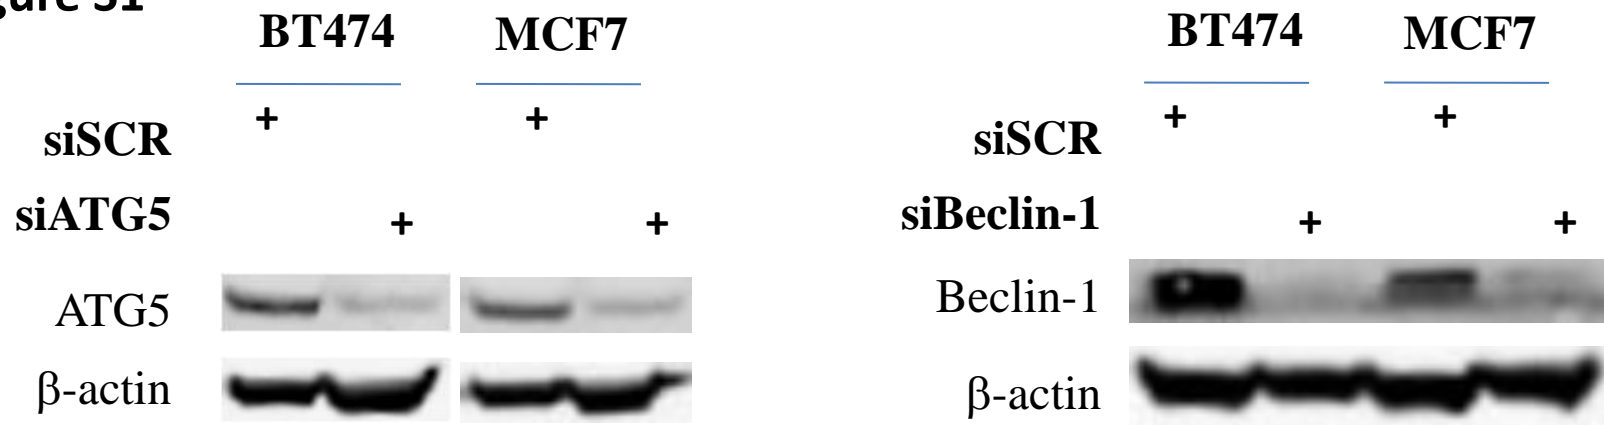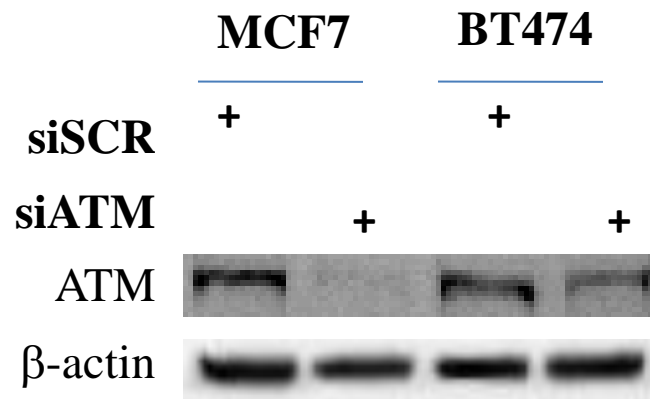

**Figure S2**

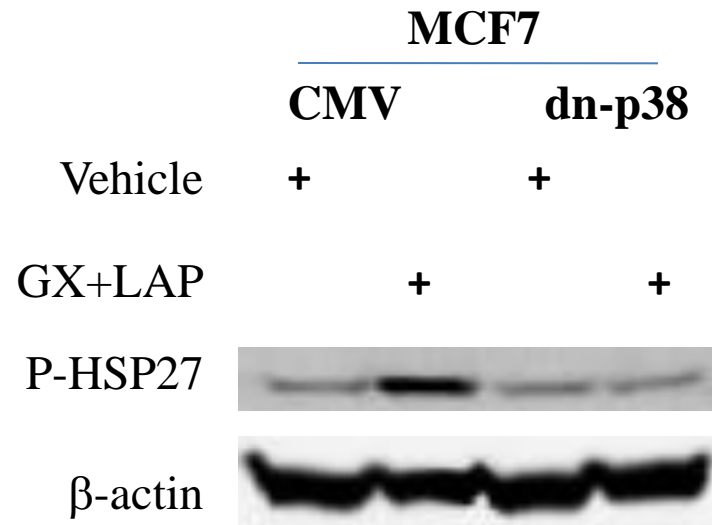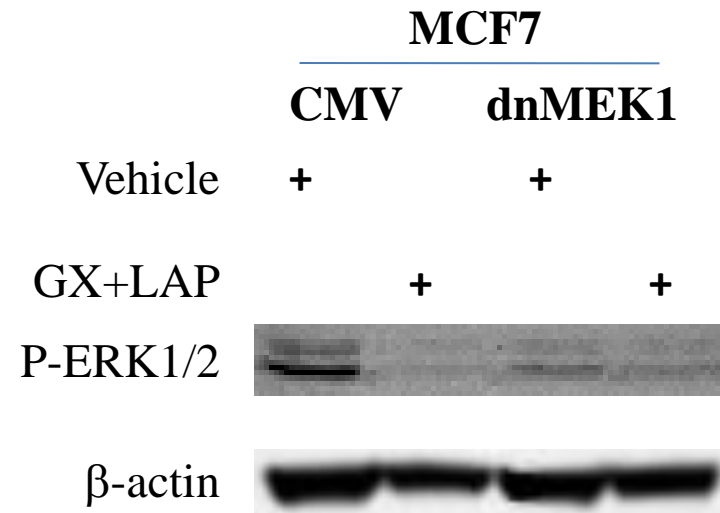

**Figure S3**

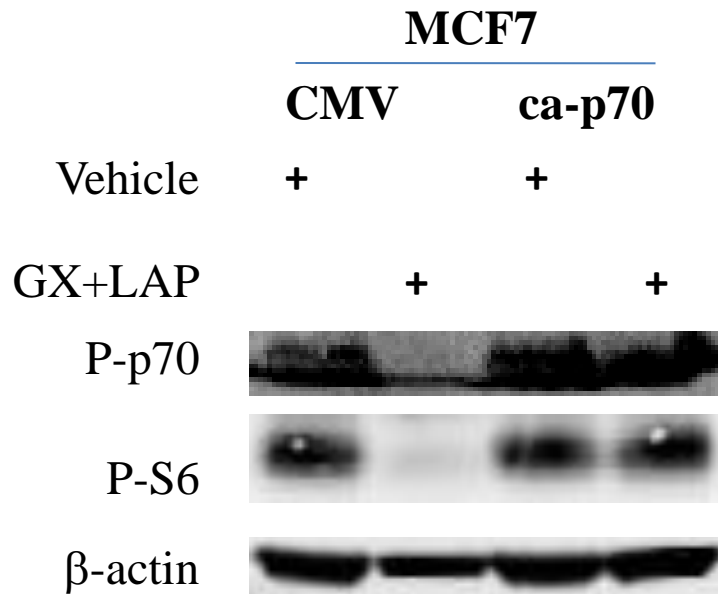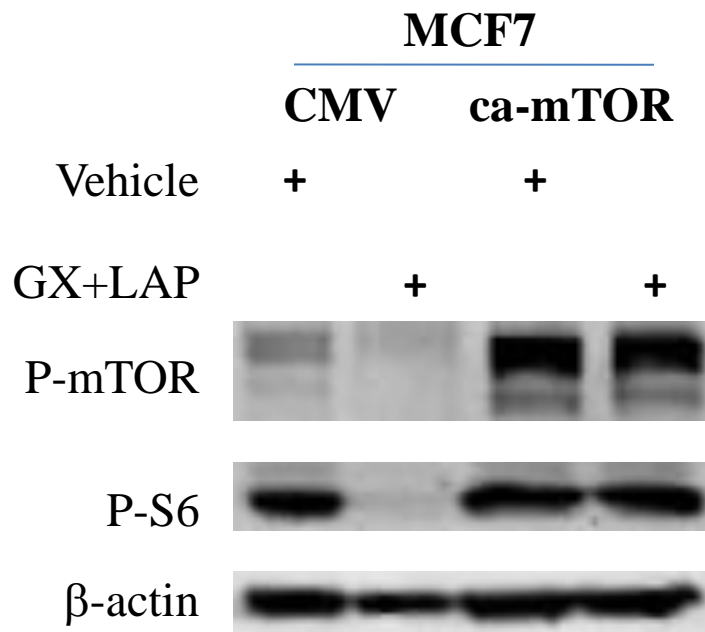

Supplement: supp_mol.111.076851_supplemental_figure_legend_and_figures.pdf [file supp_mol.111.076851_supplemental_figure_legend_and_figures.pdf]
